# Supplementary material for: Synthesis of Caffeic Acid Amides Bearing 2,3,4,5-Tetra-hydrobenzo[b][1,4]dioxocine Moieties and Their Biological Evaluation as Antitumor Agents
Source: Molecules. 2014 Jun 3;19(6):7269–86. doi: 10.3390/molecules19067269 (PMC6271756; doi:10.3390/molecules19067269)
Supplement: Supplementary file 1 [file molecules-19-07269-s001.cif]

 
data_mo_nj_yjw_73_0m 
 
_audit_creation_method            SHELXL-97 
_chemical_name_systematic 
; 
 ? 
; 
_chemical_name_common             ? 
_chemical_melting_point           ? 
_chemical_formula_moiety          ? 
_chemical_formula_sum 
 'C H N O' 
_chemical_formula_weight          353.41 
 
loop_ 
 _atom_type_symbol 
 _atom_type_description 
 _atom_type_scat_dispersion_real 
 _atom_type_scat_dispersion_imag 
 _atom_type_scat_source 
 'C'  'C'   0.0033   0.0016 
 'International Tables Vol C Tables 4.2.6.8 and 6.1.1.4' 
 'H'  'H'   0.0000   0.0000 
 'International Tables Vol C Tables 4.2.6.8 and 6.1.1.4' 
 'N'  'N'   0.0061   0.0033 
 'International Tables Vol C Tables 4.2.6.8 and 6.1.1.4' 
 'O'  'O'   0.0106   0.0060 
 'International Tables Vol C Tables 4.2.6.8 and 6.1.1.4' 
 
_symmetry_cell_setting            ? 
_symmetry_space_group_name_H-M    ? 
 
loop_ 
 _symmetry_equiv_pos_as_xyz 
 'x, y, z' 
 '-x, y, -z+1/2' 
 'x+1/2, y+1/2, z' 
 '-x+1/2, y+1/2, -z+1/2' 
 '-x, -y, -z' 
 'x, -y, z-1/2' 
 '-x+1/2, -y+1/2, -z' 
 'x+1/2, -y+1/2, z-1/2' 
 
_cell_length_a                    26.838(5) 
_cell_length_b                    9.9597(16) 
_cell_length_c                    18.698(3) 
_cell_angle_alpha                 90.00 
_cell_angle_beta                  133.339(4) 
_cell_angle_gamma                 90.00 
_cell_volume                      3635.0(10) 
_cell_formula_units_Z             72 
_cell_measurement_temperature     273(2) 
_cell_measurement_reflns_used     ? 
_cell_measurement_theta_min       ? 
_cell_measurement_theta_max       ? 
 
_exptl_crystal_description        ? 
_exptl_crystal_colour             ? 
_exptl_crystal_size_max           ? 
_exptl_crystal_size_mid           ? 
_exptl_crystal_size_min           ? 
_exptl_crystal_density_meas       ? 
_exptl_crystal_density_diffrn     1.415 
_exptl_crystal_density_method     'not measured' 
_exptl_crystal_F_000              1584 
_exptl_absorpt_coefficient_mu     0.127 
_exptl_absorpt_correction_type    ? 
_exptl_absorpt_correction_T_min   ? 
_exptl_absorpt_correction_T_max   ? 
_exptl_absorpt_process_details    ? 
 
_exptl_special_details 
; 
 ? 
; 
 
_diffrn_ambient_temperature       273(2) 
_diffrn_radiation_wavelength      0.71073 
_diffrn_radiation_type            MoK\a 
_diffrn_radiation_source          'fine-focus sealed tube' 
_diffrn_radiation_monochromator   graphite 
_diffrn_measurement_device_type   ? 
_diffrn_measurement_method        ? 
_diffrn_detector_area_resol_mean  ? 
_diffrn_standards_number          ? 
_diffrn_standards_interval_count  ? 
_diffrn_standards_interval_time   ? 
_diffrn_standards_decay_%         ? 
_diffrn_reflns_number             17808 
_diffrn_reflns_av_R_equivalents   0.1279 
_diffrn_reflns_av_sigmaI/netI     0.1345 
_diffrn_reflns_limit_h_min        -32 
_diffrn_reflns_limit_h_max        32 
_diffrn_reflns_limit_k_min        -12 
_diffrn_reflns_limit_k_max        12 
_diffrn_reflns_limit_l_min        -22 
_diffrn_reflns_limit_l_max        21 
_diffrn_reflns_theta_min          2.09 
_diffrn_reflns_theta_max          25.97 
_reflns_number_total              3512 
_reflns_number_gt                 1499 
_reflns_threshold_expression      >2sigma(I) 
 
_computing_data_collection        ? 
_computing_cell_refinement        ? 
_computing_data_reduction         ? 
_computing_structure_solution     'SHELXS-97 (Sheldrick, 1990)' 
_computing_structure_refinement   'SHELXL-97 (Sheldrick, 1997)' 
_computing_molecular_graphics     ? 
_computing_publication_material   ? 
 
_refine_special_details 
; 
 Refinement of F^2^ against ALL reflections.  The weighted R-factor wR and 
 goodness of fit S are based on F^2^, conventional R-factors R are based 
 on F, with F set to zero for negative F^2^. The threshold expression of 
 F^2^ > 2sigma(F^2^) is used only for calculating R-factors(gt) etc. and is 
 not relevant to the choice of reflections for refinement.  R-factors based 
 on F^2^ are statistically about twice as large as those based on F, and R- 
 factors based on ALL data will be even larger. 
; 
 
_refine_ls_structure_factor_coef  Fsqd  
_refine_ls_matrix_type            full 
_refine_ls_weighting_scheme       calc  
_refine_ls_weighting_details 
 'calc w=1/[\s^2^(Fo^2^)+(0.0505P)^2^+0.0000P] where P=(Fo^2^+2Fc^2^)/3' 
_atom_sites_solution_primary      direct 
_atom_sites_solution_secondary    difmap 
_atom_sites_solution_hydrogens    geom 
_refine_ls_hydrogen_treatment     mixed 
_refine_ls_extinction_method      none 
_refine_ls_extinction_coef        ? 
_refine_ls_number_reflns          3512 
_refine_ls_number_parameters      236 
_refine_ls_number_restraints      0 
_refine_ls_R_factor_all           0.1965 
_refine_ls_R_factor_gt            0.0575 
_refine_ls_wR_factor_ref          0.1310 
_refine_ls_wR_factor_gt           0.0984 
_refine_ls_goodness_of_fit_ref    0.984 
_refine_ls_restrained_S_all       0.984 
_refine_ls_shift/su_max           0.000 
_refine_ls_shift/su_mean          0.000 
 
loop_ 
 _atom_site_label 
 _atom_site_type_symbol 
 _atom_site_fract_x 
 _atom_site_fract_y 
 _atom_site_fract_z 
 _atom_site_U_iso_or_equiv 
 _atom_site_adp_type 
 _atom_site_occupancy 
 _atom_site_symmetry_multiplicity 
 _atom_site_calc_flag 
 _atom_site_refinement_flags 
 _atom_site_disorder_assembly 
 _atom_site_disorder_group 
O1 O 1.04315(9) 0.39860(16) 1.19096(13) 0.0553(5) Uani 1 1 d . . . 
O4 O 0.39287(10) 0.28583(18) 0.19626(13) 0.0636(6) Uani 1 1 d . . . 
O3 O 0.41672(10) 0.55668(18) 0.26765(14) 0.0646(6) Uani 1 1 d . . . 
O2 O 0.75238(9) 0.51584(18) 0.77374(13) 0.0657(6) Uani 1 1 d . . . 
N1 N 0.78951(11) 0.3011(2) 0.81461(15) 0.0557(7) Uani 1 1 d . . . 
H1 H 0.7787 0.2186 0.7963 0.067 Uiso 1 1 calc R . . 
C1 C 0.85443(15) 0.3279(2) 0.9106(2) 0.0464(7) Uani 1 1 d . . . 
C2 C 0.98282(15) 0.3738(2) 1.0972(2) 0.0455(7) Uani 1 1 d . . . 
C3 C 0.68451(14) 0.3454(3) 0.6520(2) 0.0516(8) Uani 1 1 d . . . 
H3 H 0.6829 0.2545 0.6391 0.062 Uiso 1 1 calc R . . 
C4 C 0.92453(15) 0.3897(3) 1.0796(2) 0.0569(8) Uani 1 1 d . . . 
H4 H 0.9278 0.4163 1.1304 0.068 Uiso 1 1 calc R . . 
C5 C 0.50185(15) 0.2291(3) 0.3480(2) 0.0539(8) Uani 1 1 d . . . 
H5 H 0.4953 0.1429 0.3236 0.065 Uiso 1 1 calc R . . 
C6 C 0.63350(14) 0.4226(3) 0.5813(2) 0.0552(8) Uani 1 1 d . . . 
H6 H 0.6370 0.5125 0.5977 0.066 Uiso 1 1 calc R . . 
C7 C 0.45096(14) 0.3245(3) 0.28850(19) 0.0488(8) Uani 1 1 d . . . 
C8 C 0.52218(15) 0.4826(3) 0.4193(2) 0.0557(8) Uani 1 1 d . . . 
H8 H 0.5287 0.5691 0.4433 0.067 Uiso 1 1 calc R . . 
C9 C 0.56159(14) 0.2590(3) 0.44200(19) 0.0521(8) Uani 1 1 d . . . 
H9 H 0.5952 0.1936 0.4801 0.063 Uiso 1 1 calc R . . 
C10 C 0.57234(14) 0.3864(3) 0.48092(19) 0.0486(7) Uani 1 1 d . . . 
C11 C 1.10528(14) 0.3883(3) 1.2116(2) 0.0638(9) Uani 1 1 d . . . 
H11A H 1.1027 0.4448 1.1669 0.077 Uiso 1 1 calc R . . 
H11B H 1.1124 0.2962 1.2034 0.077 Uiso 1 1 calc R . . 
C12 C 0.91258(17) 0.3130(3) 0.9287(2) 0.0602(8) Uani 1 1 d . . . 
H12 H 0.9091 0.2868 0.8777 0.072 Uiso 1 1 calc R . . 
C13 C 0.97717(15) 0.3358(3) 1.0215(2) 0.0602(8) Uani 1 1 d . . . 
H13 H 1.0162 0.3253 1.0320 0.072 Uiso 1 1 calc R . . 
C14 C 0.74392(14) 0.3962(3) 0.7506(2) 0.0502(8) Uani 1 1 d . . . 
C15 C 0.46297(14) 0.4540(3) 0.3237(2) 0.0499(8) Uani 1 1 d . . . 
C16 C 1.16323(14) 0.4330(3) 1.3159(2) 0.0787(10) Uani 1 1 d . . . 
H16A H 1.1548 0.5229 1.3238 0.118 Uiso 1 1 calc R . . 
H16B H 1.2053 0.4307 1.3308 0.118 Uiso 1 1 calc R . . 
H16C H 1.1666 0.3740 1.3597 0.118 Uiso 1 1 calc R . . 
C17 C 0.86088(15) 0.3666(3) 0.9871(2) 0.0595(8) Uani 1 1 d . . . 
H17 H 0.8218 0.3775 0.9764 0.071 Uiso 1 1 calc R . . 
C18 C 0.32696(14) 0.3351(3) 0.1552(2) 0.0686(9) Uani 1 1 d . . . 
H18A H 0.3326 0.3851 0.2049 0.082 Uiso 1 1 calc R . . 
H18B H 0.2968 0.2598 0.1349 0.082 Uiso 1 1 calc R . . 
C19 C 0.29548(15) 0.4241(3) 0.0684(2) 0.0812(11) Uani 1 1 d . . . 
H19A H 0.2463 0.4257 0.0273 0.097 Uiso 1 1 calc R . . 
H19B H 0.3038 0.3846 0.0299 0.097 Uiso 1 1 calc R . . 
C20 C 0.39770(15) 0.5811(3) 0.1755(2) 0.0722(10) Uani 1 1 d . . . 
H20A H 0.4203 0.5167 0.1668 0.087 Uiso 1 1 calc R . . 
H20B H 0.4120 0.6705 0.1754 0.087 Uiso 1 1 calc R . . 
C21 C 0.32152(15) 0.5681(3) 0.0931(2) 0.0839(11) Uani 1 1 d . . . 
H21A H 0.3076 0.6099 0.0348 0.101 Uiso 1 1 calc R . . 
H21B H 0.2999 0.6171 0.1105 0.101 Uiso 1 1 calc R . . 
 
loop_ 
 _atom_site_aniso_label 
 _atom_site_aniso_U_11 
 _atom_site_aniso_U_22 
 _atom_site_aniso_U_33 
 _atom_site_aniso_U_23 
 _atom_site_aniso_U_13 
 _atom_site_aniso_U_12 
O1 0.0415(13) 0.0599(12) 0.0471(13) -0.0042(10) 0.0237(12) -0.0017(10) 
O4 0.0473(13) 0.0634(13) 0.0517(13) -0.0111(11) 0.0230(12) 0.0016(11) 
O3 0.0633(14) 0.0518(12) 0.0496(13) 0.0041(10) 0.0275(12) 0.0119(11) 
O2 0.0667(15) 0.0397(12) 0.0546(13) -0.0003(10) 0.0277(12) -0.0005(10) 
N1 0.0533(16) 0.0345(13) 0.0424(15) -0.0013(12) 0.0186(14) -0.0019(12) 
C1 0.047(2) 0.0389(17) 0.0402(18) 0.0017(13) 0.0249(18) -0.0016(14) 
C2 0.045(2) 0.0396(17) 0.0417(19) 0.0021(14) 0.0260(18) 0.0009(15) 
C3 0.052(2) 0.0418(17) 0.0446(18) -0.0017(15) 0.0270(18) -0.0043(15) 
C4 0.052(2) 0.067(2) 0.046(2) -0.0113(16) 0.0315(19) -0.0072(17) 
C5 0.057(2) 0.0423(17) 0.053(2) -0.0027(16) 0.0342(18) 0.0000(16) 
C6 0.058(2) 0.0405(17) 0.0485(19) -0.0013(15) 0.0296(19) -0.0021(16) 
C7 0.047(2) 0.0479(19) 0.0392(18) -0.0045(16) 0.0246(18) -0.0026(16) 
C8 0.059(2) 0.0420(17) 0.050(2) -0.0016(16) 0.0312(19) -0.0023(17) 
C9 0.052(2) 0.0471(18) 0.0447(19) 0.0037(15) 0.0282(18) 0.0061(15) 
C10 0.0477(19) 0.0433(17) 0.0397(17) -0.0006(16) 0.0242(17) -0.0035(16) 
C11 0.053(2) 0.060(2) 0.062(2) 0.0040(17) 0.0330(19) -0.0010(17) 
C12 0.066(2) 0.063(2) 0.051(2) -0.0089(16) 0.040(2) -0.0025(18) 
C13 0.049(2) 0.070(2) 0.056(2) -0.0055(16) 0.034(2) 0.0001(16) 
C14 0.052(2) 0.0414(18) 0.0464(19) 0.0039(16) 0.0296(18) -0.0021(16) 
C15 0.046(2) 0.0430(18) 0.0453(19) 0.0050(16) 0.0252(18) 0.0058(16) 
C16 0.047(2) 0.086(2) 0.065(2) -0.0046(18) 0.0237(19) -0.0103(18) 
C17 0.046(2) 0.073(2) 0.054(2) -0.0059(17) 0.0318(19) -0.0033(16) 
C18 0.045(2) 0.061(2) 0.070(2) -0.0078(18) 0.0282(19) -0.0055(17) 
C19 0.054(2) 0.077(2) 0.055(2) -0.0041(19) 0.0152(19) 0.0044(19) 
C20 0.060(2) 0.065(2) 0.059(2) 0.0177(17) 0.029(2) 0.0033(18) 
C21 0.068(3) 0.069(2) 0.063(2) 0.0079(18) 0.025(2) 0.0028(19) 
 
_geom_special_details 
; 
 All esds (except the esd in the dihedral angle between two l.s. planes) 
 are estimated using the full covariance matrix.  The cell esds are taken 
 into account individually in the estimation of esds in distances, angles 
 and torsion angles; correlations between esds in cell parameters are only 
 used when they are defined by crystal symmetry.  An approximate (isotropic) 
 treatment of cell esds is used for estimating esds involving l.s. planes. 
; 
 
loop_ 
 _geom_bond_atom_site_label_1 
 _geom_bond_atom_site_label_2 
 _geom_bond_distance 
 _geom_bond_site_symmetry_2 
 _geom_bond_publ_flag 
O1 C2 1.364(3) . ? 
O1 C11 1.434(3) . ? 
O4 C7 1.365(3) . ? 
O4 C18 1.447(3) . ? 
O3 C15 1.378(3) . ? 
O3 C20 1.443(3) . ? 
O2 C14 1.234(3) . ? 
N1 C14 1.348(3) . ? 
N1 C1 1.427(3) . ? 
C1 C12 1.359(3) . ? 
C1 C17 1.372(3) . ? 
C2 C13 1.369(3) . ? 
C2 C4 1.369(3) . ? 
C3 C6 1.315(3) . ? 
C3 C14 1.471(3) . ? 
C4 C17 1.381(3) . ? 
C5 C9 1.372(3) . ? 
C5 C7 1.386(3) . ? 
C6 C10 1.456(3) . ? 
C7 C15 1.382(3) . ? 
C8 C15 1.379(3) . ? 
C8 C10 1.389(3) . ? 
C9 C10 1.390(3) . ? 
C11 C16 1.502(3) . ? 
C12 C13 1.392(3) . ? 
C18 C19 1.500(4) . ? 
C19 C21 1.522(4) . ? 
C20 C21 1.499(4) . ? 
 
loop_ 
 _geom_angle_atom_site_label_1 
 _geom_angle_atom_site_label_2 
 _geom_angle_atom_site_label_3 
 _geom_angle 
 _geom_angle_site_symmetry_1 
 _geom_angle_site_symmetry_3 
 _geom_angle_publ_flag 
C2 O1 C11 117.9(2) . . ? 
C7 O4 C18 119.7(2) . . ? 
C15 O3 C20 115.4(2) . . ? 
C14 N1 C1 124.5(2) . . ? 
C12 C1 C17 118.0(3) . . ? 
C12 C1 N1 119.6(3) . . ? 
C17 C1 N1 122.4(3) . . ? 
O1 C2 C13 124.8(3) . . ? 
O1 C2 C4 116.1(3) . . ? 
C13 C2 C4 119.1(3) . . ? 
C6 C3 C14 122.9(3) . . ? 
C2 C4 C17 120.6(3) . . ? 
C9 C5 C7 121.4(2) . . ? 
C3 C6 C10 128.7(3) . . ? 
O4 C7 C15 123.8(3) . . ? 
O4 C7 C5 117.5(2) . . ? 
C15 C7 C5 118.6(3) . . ? 
C15 C8 C10 122.1(3) . . ? 
C5 C9 C10 120.6(3) . . ? 
C8 C10 C9 117.4(2) . . ? 
C8 C10 C6 119.5(3) . . ? 
C9 C10 C6 123.1(3) . . ? 
O1 C11 C16 107.7(2) . . ? 
C1 C12 C13 121.8(3) . . ? 
C2 C13 C12 119.5(3) . . ? 
O2 C14 N1 122.1(2) . . ? 
O2 C14 C3 123.5(2) . . ? 
N1 C14 C3 114.4(2) . . ? 
O3 C15 C8 117.9(2) . . ? 
O3 C15 C7 122.5(3) . . ? 
C8 C15 C7 119.6(2) . . ? 
C1 C17 C4 121.0(3) . . ? 
O4 C18 C19 110.5(3) . . ? 
C18 C19 C21 115.3(2) . . ? 
O3 C20 C21 109.1(3) . . ? 
C20 C21 C19 114.3(2) . . ? 
 
_diffrn_measured_fraction_theta_max    0.988 
_diffrn_reflns_theta_full              25.97 
_diffrn_measured_fraction_theta_full   0.988 
_refine_diff_density_max    0.181 
_refine_diff_density_min   -0.202 
_refine_diff_density_rms    0.048 
